# Supplementary material for: Novel photoacid generators for cationic photopolymerization
Source: Royal Society of Chemistry journal article supplement (doi:10.1039/c7py00855d), 2017-01-01
Supplement: c7py00855d1.pdf [file c7py00855d1.pdf]

Supplementary Information on:

Novel photoacid generator for cationic photopolymerization

Nicolas Klikovits,<sup>a</sup> Patrick Knaack,<sup>a</sup> Daniel Bomze,<sup>a</sup> Ingo Krossing<sup>b</sup> and Robert Liska<sup>a</sup>

Received 00th January 20xx,  
Accepted 00th January 20xx

DOI: 10.1039/x0xx00000x

www.rsc.org/

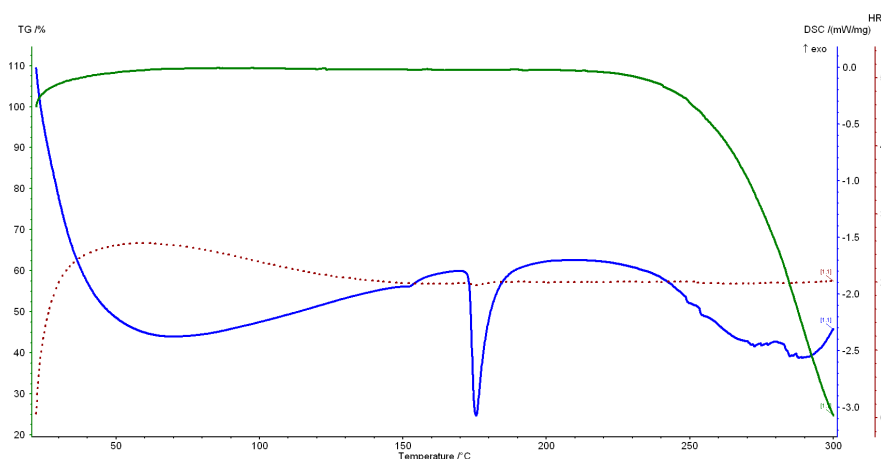

Figure 1 Simultaneous thermal analysis (STA) of I-AI with thermogravimetric analysis (TGA —) and differential scanning calorimetry (DSC —) curves and heating rate (—)

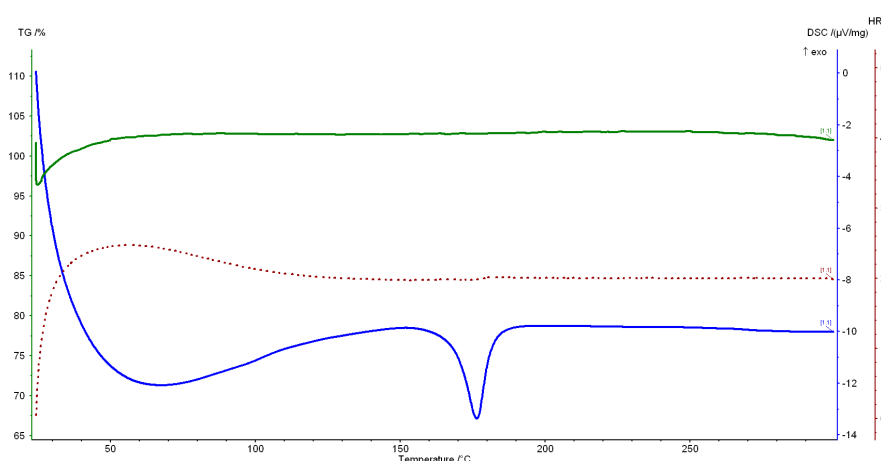

Figure 2 Simultaneous thermal analysis (STA) of S-AI with thermogravimetric analysis (TGA —) and differential scanning calorimetry (DSC —) curves and heating rate (—)

<sup>a</sup> Institute of Applied Synthetic Chemistry, TU-Wien, Vienna, Austria.

<sup>b</sup> Institute of Inorganic and Analytical Chemistry, University Freiburg, Freiburg, Germany.

Figures 1 and 2 show the STA plots of **I-AI** and **S-AI**, respectively. As the thermal stability is determined by the cation of the salts, all analyzed diphenyliodonium **PAGs** showed similar thermal degradation by a drop in the thermogravimetric curve and decomposition processes in the DSC-curve starting at 220 °C. All analyzed triarylsulfonium **PAGs** showed thermal stability below 300 °C by a constant thermogravimetric and DSC-Curve. The compared **PAGs** only differed in their melting points, which are characterized by an abrupt minimum in the DSC curve.
